# Supplementary material for: Integrating CuInSe2nanocrystals with polymeric carbon nitride nanorods for photocatalytic water splitting
Source: Royal Society of Chemistry journal article supplement (doi:10.1039/d0dt00865f), 2020-01-01
Supplement: d0dt00865f1.pdf [file d0dt00865f1.pdf]

## Electronic Supplementary Information

### **Integrating CuInSe<sub>2</sub> Nanocrystals with Polymeric Carbon Nitride Nanorods for Photocatalytic Water Splitting**

Yun Zheng,<sup>\*a, b, c</sup> Yilin Chen,<sup>a</sup> Lvting Wang,<sup>a</sup> Mingyue Tan,<sup>a</sup> Yingying Xiao,<sup>a</sup> Bifen Gao<sup>a</sup>  
and Bizhou Lin<sup>a</sup>

*<sup>a</sup>Fujian Key Laboratory of Photoelectric Functional Materials, College of Materials  
Science and Engineering, Huaqiao University, Xiamen, Fujian 361021, P. R. China.*

*E-mail: zheng-yun@hqu.edu.cn*

*<sup>b</sup>Institute of Luminescent Materials and Information Display, College of Materials  
Science and Engineering, Huaqiao University, Xiamen, 361021, P. R. China.*

*<sup>c</sup>State Key Laboratory of Photocatalysis on Energy and Environment, College of  
Chemistry, Fuzhou University, Fuzhou, Fujian 350116, P. R. China*

## Experimental section

### *Chemicals and reagents*

L-alanine (BR), NaOH (AR),  $\text{NH}_4\text{HF}_2$  (AR), Copper iodide (CuI, 99.998%), chloroplatinic acid (99.9%), and  $\text{Na}_2\text{SO}_4$  (AR) were purchased from the China Sinopharm Chemical reagent Co. Ltd. oleylamine (OAm, C18: 80-90%) and 1-octadecene (ODE, 90%) were supplied by Aladdin-reagent. Tetradecanoyl chloride (97%), tetraethoxysilane (98%), Indium acetate ( $\text{In}(\text{OAc})_3$ , 99.99%), and sulfur powder (99.99%) were purchased from Sigma Aldrich Company. 3-aminopropyl triethoxysilane (98%) were purchased from J&K Chemical Ltd. Cyanamide (98%), and 3-mercaptopropionic acid (MPA, 97%) were obtained from Alfa Aesar Company. The solvents, including HCl (37%), acetone (AR), chloroform (AR), petroleum ether (AR), and triethanolamine (AR) were purchased from China Sinopharm Chemical reagent Co. Ltd. All chemicals were used as received without further processing. Deionized water with a resistance of 18.3 M  $\Omega$  cm was used in the experiment. Ar gas (super grade purity, 99.999%) was supplied by Fuzhou Lianzhong Industrial Gases Co. Ltd.

### *Synthesis of N-myristoylalanine ( $\text{C}_{14}$ -L-Ala)*

$\text{C}_{14}$ -L-Ala was synthesized according to ref. <sup>1</sup>. L-alanine (0.24 mol, 21.4 g) was mixed with deionized water (140 mL), NaOH (19.2 g) and acetone (120 mL). Under vigorous stirring at 0°C, the mixture was dropwise added with tetradecanoyl chloride (0.2 mol, 49.3 g). Meanwhile, 20mL 0.2M NaOH solution was injected to maintain the pH at ~12. After reaction for 1 hour, a certain amount of HCl solution was added to adjust

the pH at 1. The solids were washed with deionized water till neutral, cleaned with petroleum ether for several times, and vacuum dried at 50 °C. The yield of C<sub>14</sub>-L-Ala is 30~35g.

### ***Synthesis of chiral mesoporous silica (CMS)***

CMS was synthesized according to ref.<sup>2</sup>. C<sub>14</sub>-L-Ala (0.321 g, 1.0 mmol) was dissolved in deionized water (22.1 g), and added with 0.01 M HCl (10 g, 0.1 mmol) under vigorous stirring at room temperature. After 1 h, a mixture of tetraethoxysilane (1.40 g, 6.7 mmol) and 3-aminopropyl triethoxysilane (0.23 g, 1.0 mmol) was added to the mixture with stirring at 400 rpm for 10min. Then the mixture reacted at room temperature under static conditions for 24 h. The products were collected by filtration and dried at 80 °C, and calcined at 550 °C for 6 h under air to remove the surfactants. The yield of CMS is 0.1~0.2g.

### ***Characterization***

The scanning emission microscope (SEM) measurements were conducted using Hitachi SU-8010 and S4800 Field Emission Scanning Electron Microscope. Transmission electro microscopy (TEM) was obtained using a FEI TECNAI G2F20 instrument. X-ray diffraction (XRD) measurements were collected on a Bruker D8 Advance diffractometer with Cu Ka1 radiation ( $\lambda=1.5406 \text{ \AA}$ ). Fourier transform infrared (FT-IR) spectra were collected with a thermo Nicolet Nexus 670 FTIR spectrometer, and the samples were mixed with KBr at a concentration of ca. 0.2 wt%. X-Ray photoelectron spectroscopy (XPS) data were obtained on a Thermo Scientific ESCALAB250 instrument with a monochromatized Al K $\alpha$  line source (200

W). All binding energies were referenced to the C 1s peak at 284.8 eV of surface adventitious carbon. The UV-Vis diffuse reflectance spectra (DRS) were measured on a Cary 5000 Scan UV-Vis-NIR system of Agilent Technologies. Photoluminescence (PL) spectra were recorded on an Edinburgh F1/FSTCSPC 920 spectrophotometer under an excitation wavelength of 400 nm. Electrochemical measurements were conducted with a BAS Epsilon Electrochemical System in a conventional three electrode cell, using a Pt plate as the counter electrode and an Ag/AgCl electrode (3 M KCl) as the reference electrode, the active area is confined to 0.25 cm<sup>2</sup>.

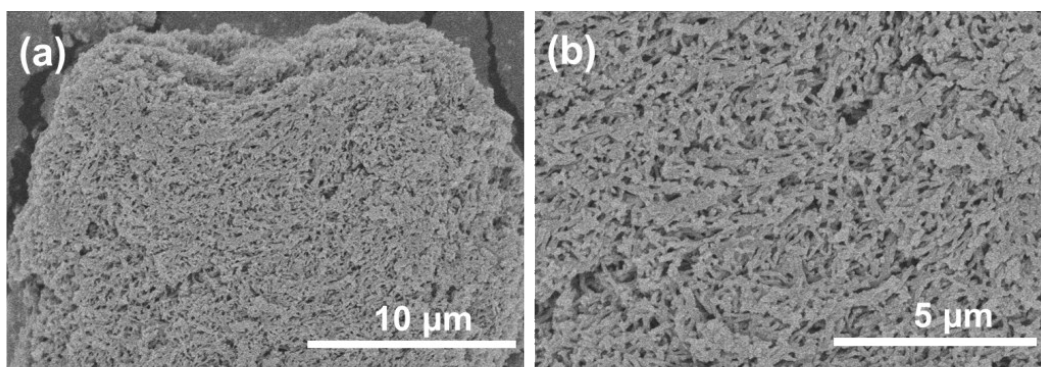

**Fig. S1** SEM images of 3% CuInSe<sub>2</sub>/CN.

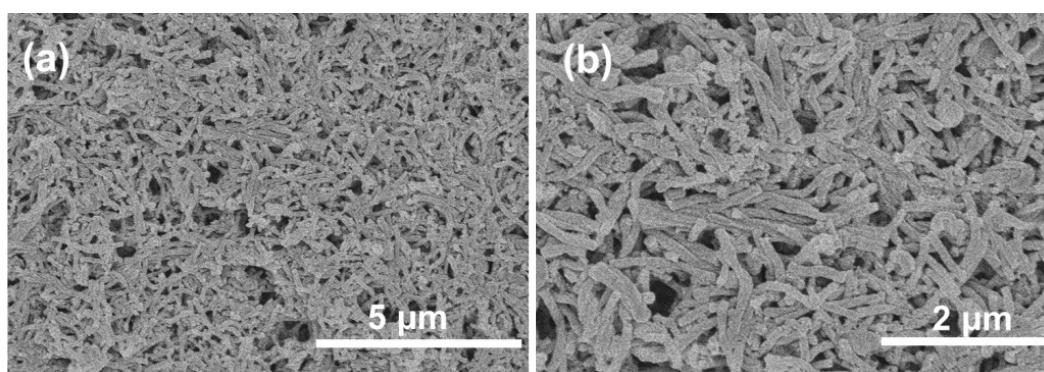

**Fig. S2** SEM images of CN nanorods.

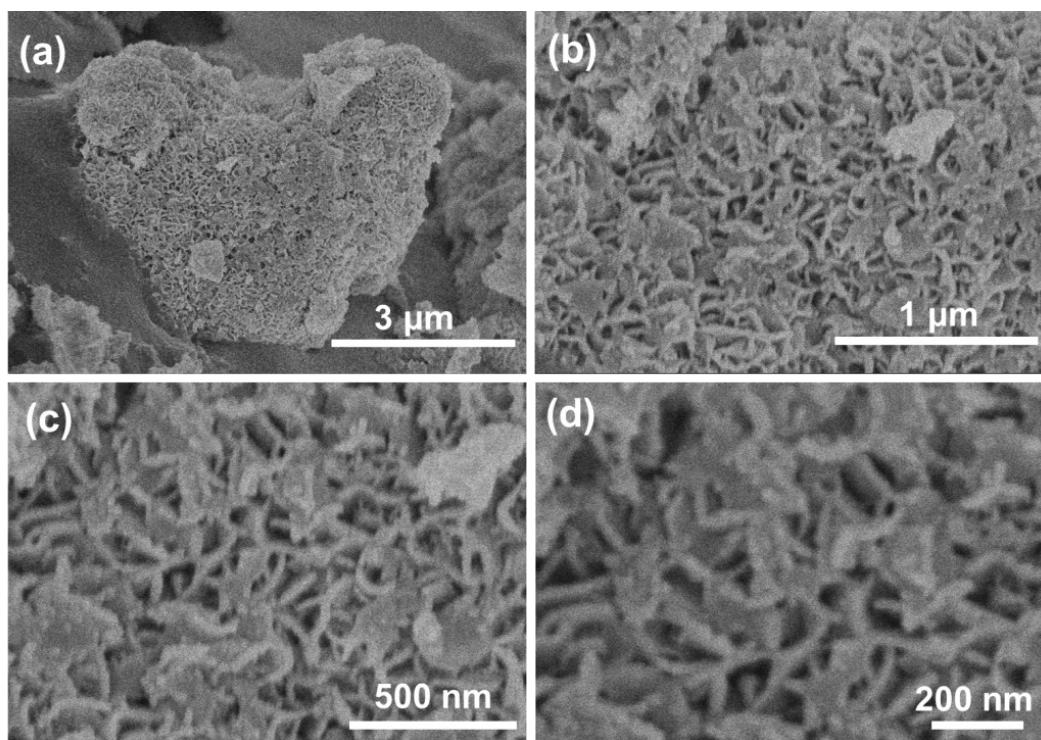

**Fig. S3** SEM images of CuInSe<sub>2</sub> nanocrystals.

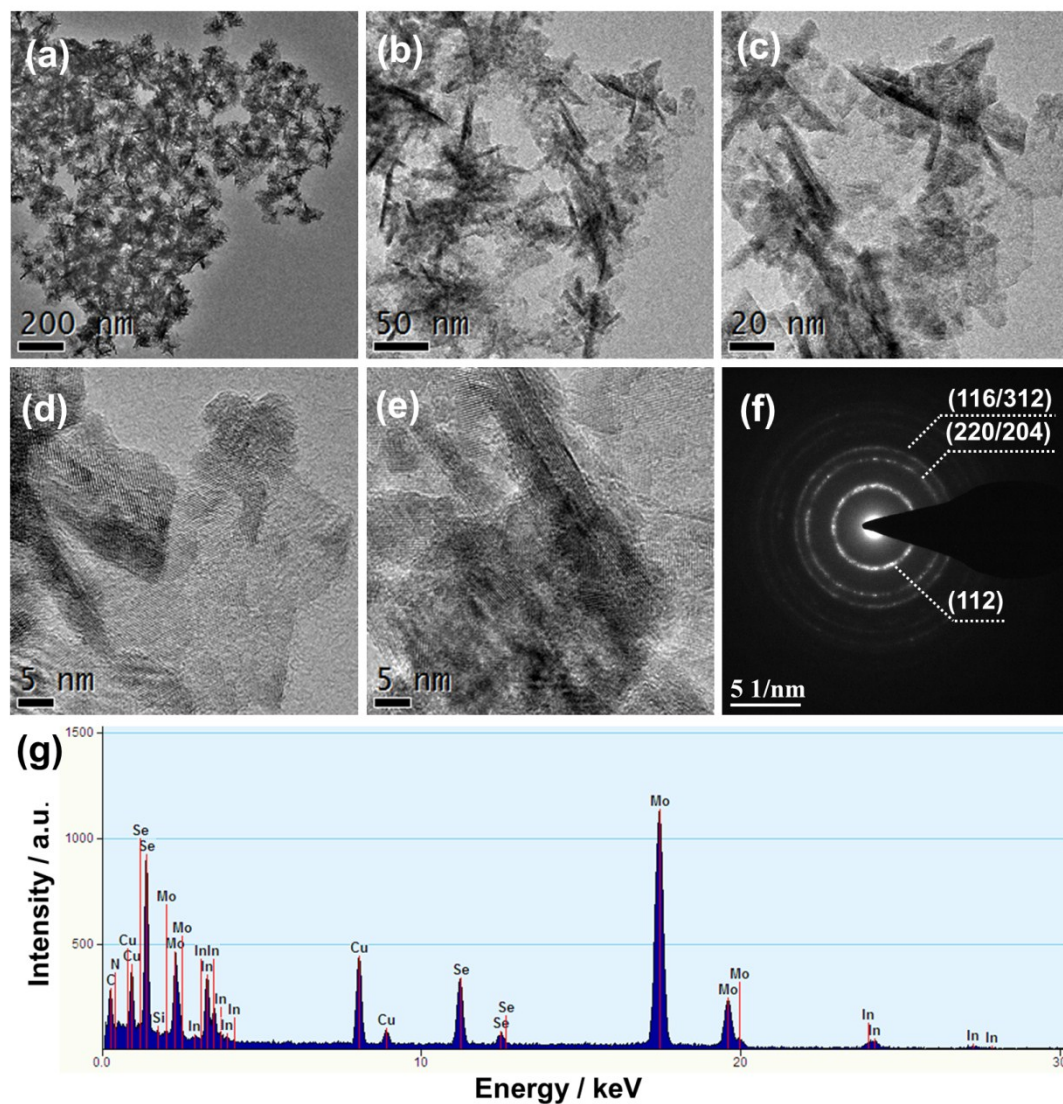

**Fig. S4** (a-c) TEM, (d-e) HRTEM, (f) SAED, and (g) EDX images of CuInSe<sub>2</sub> nanocrystals on the grid of molybdenum mesh.

Fig. S4 shows the TEM and HRTEM images of the CuInSe<sub>2</sub> nanocrystals. The average size of the CuInSe<sub>2</sub> nanocrystals is about 20-50 nm. Moreover, corresponding selected area electrical diffraction (SAED) patterns also indicate the nanocrystal structure of the as-synthesized CuInSe<sub>2</sub>. The three rings refer to the (112), (220)/(214), and (116)/(312) reflection direction. As demonstrated by the energy-dispersive X-ray spectroscopy (EDX) spectra, three elements of Cu, In and Se are detected for CuInSe<sub>2</sub> nanocrystals. It can be concluded that well crystallized tetragonal CuInSe<sub>2</sub> nanocrystals were prepared.

**Table S1.** Quantification results of CuInSe<sub>2</sub> nanocrystals on Mo sample holder by TEM-EDS.

| Element | Weight (%) | Atomic (%) | Uncertainty (%) | Correction | k-Factor |
|---------|------------|------------|-----------------|------------|----------|
| C(K)    | 2.610      | 17.009     | 0.117           | 0.173      | 6.279    |
| N(K)    | 0.000      | 0.000      | 100.000         | 0.259      | 4.045    |
| Si(K)   | 0.000      | 0.000      | 100.000         | 0.977      | 1.000    |
| Cu(K)   | 6.267      | 7.718      | 0.082           | 0.997      | 1.757    |
| Se(K)   | 9.193      | 9.110      | 0.114           | 1.000      | 2.571    |
| Mo(K)   | 77.017     | 62.815     | 0.435           | 0.998      | 4.581    |
| In(K)   | 4.911      | 3.346      | 0.151           | 0.968      | 8.226    |

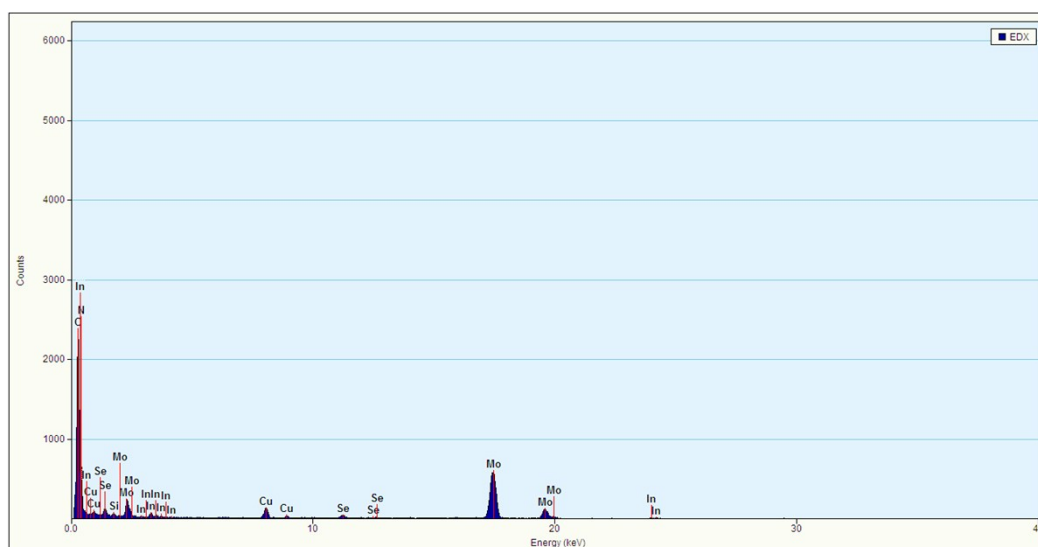

**Fig. S5** EDX images of CuInSe<sub>2</sub>/CN hybrid on the grid of molybdenum mesh.

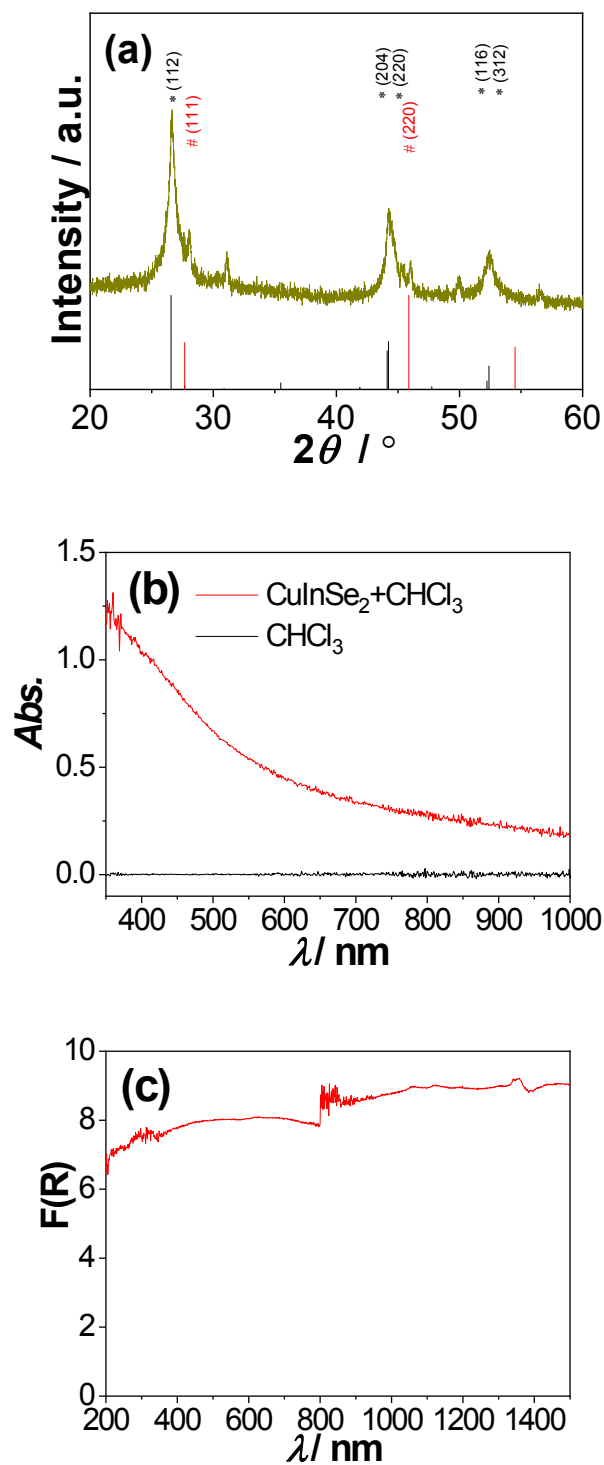

**Fig. S6** (a) XRD pattern of CuInSe<sub>2</sub>, (b) UV-Vis absorption spectra of CuInSe<sub>2</sub> and CHCl<sub>3</sub> solution, (c) UV-Vis DRS spectra of CuInSe<sub>2</sub> solids.

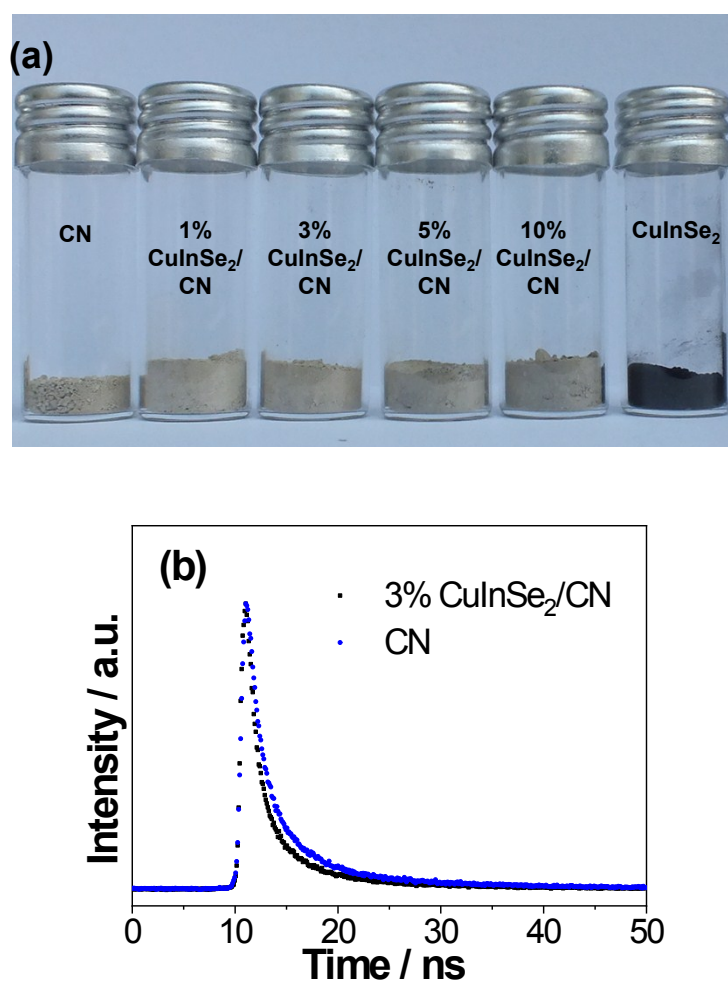

**Fig. S7** (a) Digital photograph of  $\text{CuInSe}_2/\text{CN}$  hybrids,  $\text{CuInSe}_2$  and CN, and (b) Time-resolved fluorescence spectra of CN and 3%  $\text{CuInSe}_2/\text{CN}$  excited by the incident light of 405 nm.

**Table S2** The fitted fluorescence decay components of CN and 3%  $\text{CuInSe}_2/\text{CN}$ .

| Sample                          | $\tau_1$ (ns) | $\tau_2$ (ns) | $a_1$ (%) | $a_2$ (%) | $\tau_{av}$ (ns) | $X^2$ (%) |
|---------------------------------|---------------|---------------|-----------|-----------|------------------|-----------|
| CN                              | 1.550         | 7.695         | 99.91     | 0.09      | 1.555            | 99.88     |
| 3% $\text{CuInSe}_2/\text{CTF}$ | 1.141         | 6.076         | 99.99     | 0.01      | 1.141            | 99.87     |

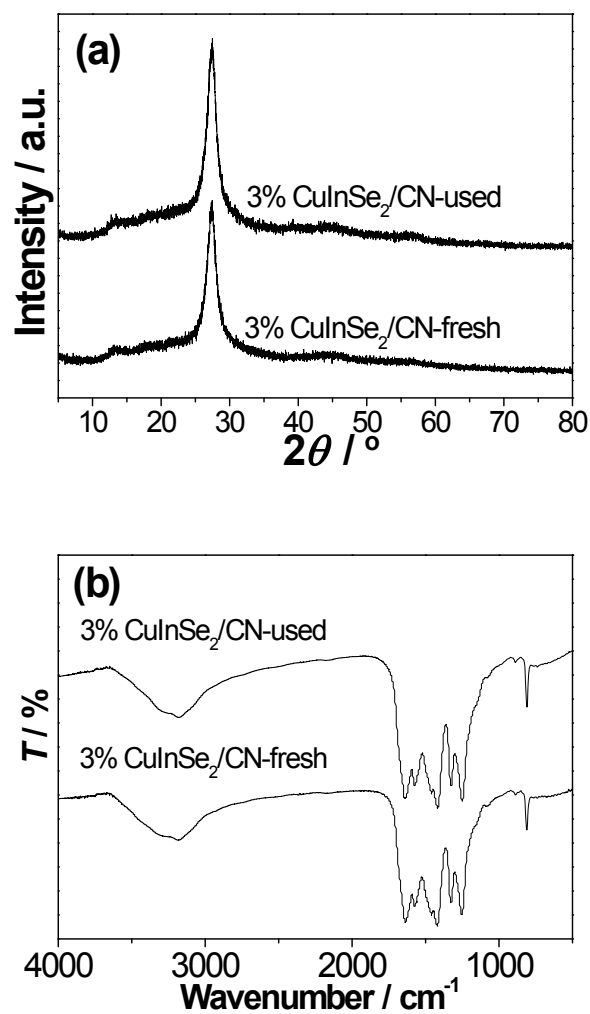

**Fig. S8** (a) XRD patterns and (b) FT-IR spectra of 3% CuInSe<sub>2</sub>/CN hybrid before and after photocatalytic water splitting reaction.

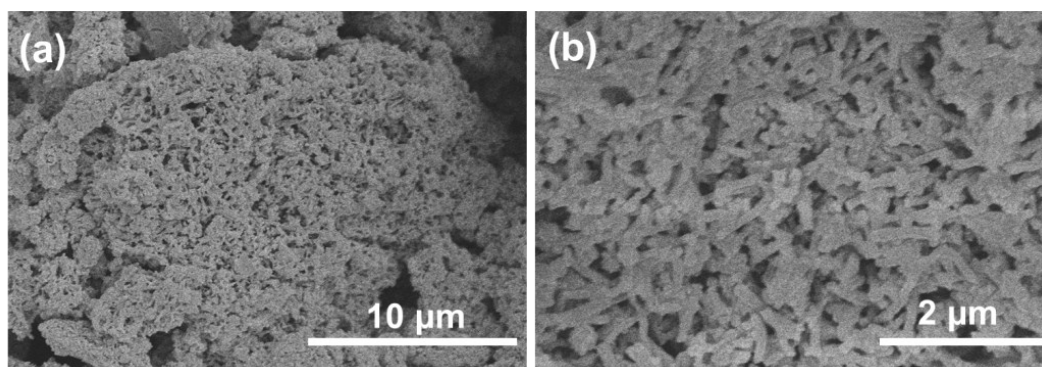

**Fig. S9** SEM images of 3% CuInSe<sub>2</sub>/CN after photocatalytic water splitting reaction.

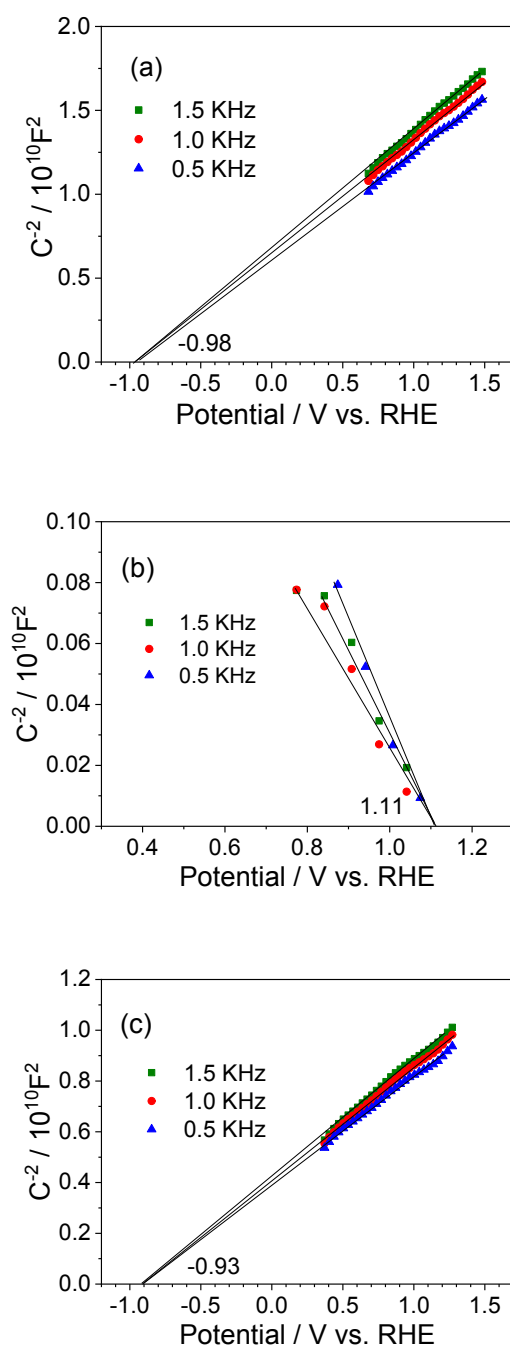

**Fig. S10** Mott-Schottky plots of (a) CN, (b)  $\text{CuInSe}_2$ , and (c) 3%  $\text{CuInSe}_2/\text{CN}$ .

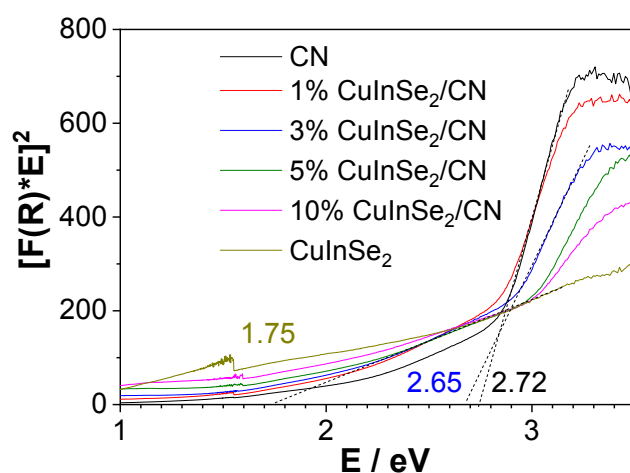

**Fig. S11** The plots of  $(\alpha h\nu)^2$  vs. photon energy ( $h\nu$ ) for CN and CuInSe<sub>2</sub>.

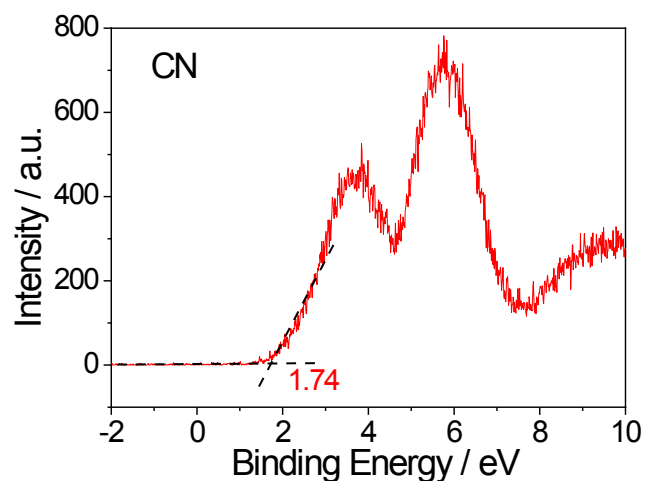

**Fig. S12** XPS valence band spectra for CN nanorods.

## References

- 1 M. Y. Takehara, I.; Takizawa, K.; Yoshida, R. , *J. Am. Oil Chem. Soc.*, 1972, **49**, 157-161.
- 2 (a) H. Jin, Z. Liu, T. Ohsuna, O. Terasaki, Y. Inoue, K. Sakamoto, T. Nakanishi, K. Ariga and S. Che, *Adv. Mater.*, 2006, **18**, 593-596; (b) H. Jin, H. Qiu, Y. Sakamoto, P. Shu, O. Terasaki and S. Che, *Chem. Eur. J.*, 2008, **14**, 6413-6420.
